# Supplementary material for: Estimating Dietary Intake and Nutrient Adequacy among Adults in Saudi Arabia: A Population-Based Assessment
Source: Research Square preprint supplement (doi:10.21203/rs.3.rs-7262955/v1), 2025-08-01
Supplement: Supplementary file 1 [file b40f1f2cdcc44820dd14e58b.docx]

**Appendix 1: Code for National Nutrition Consumption Model – Version 2 emulator**

**Part 1: Code for the Food Groups intake:**

For the daily intake of a food Groups (), it is represented as a Normal distribution in Python as follows:

| **Line** | **Code** |
| --- | --- |
| **1** | **# Step1: Import the numpy library** |
| **2** | import numpy as np # No need to import again if it has already been imported earlier |
| **3** |  |
| **4** |  |
| **3** | **# Step 2:Define your parameters of NNC_i from Table A** |
| **4** | mean_NNC = # mean from Table A |
| **5** | CI_LB = # lower bound of 95CI% from Table A |
| **6** | CI_UB = # Upper bound if 95CI% from Table A |
| **7** | i = 10000 # Number of iterations; no need to redefine if already defined |
| **8** |  |
| **9** | **# Step 3: Modeling distribution of NNC_i** |
| **10** | SD_NNC = (((CI_UB-mean_NNC)/2)+ ((mean_NNC-CI_LB)/2))/2 |
| **11** | NNC_i = np.random.normal( mean_NNC, SD_NNC,i) |
| **12** |  |
| **13** | **# Step 4 : Display key percentiles of the generated values** |
| **14** | p2_5 = np.percentile(NNC_i, 2.5) |
| **15** | p50 = np.percentile(NNC_i, 50) |
| **16** | p97_5 = np.percentile(NNC_i, 97.5) |
| **17** |  |
| **18** | print("2.5th percentile:", round(p2_5, 3)) |
| **19** | print("50th percentile (median):", round(p50, 3)) |
| **20** | print("97.5th percentile:", round(p97_5, 3)) |
| **21** |  |
| **22** |  |
| **23** |  |

**Part 2: Code for the Concentration of Nutrients in Food Groups:**

For the concentration of Nutrients within food Group (Cᵢ), it is represented as a uniform distribution in Python as follows:

| **Line** | **Code** |
| --- | --- |
| **1** | **# Step1: Import the numpy library** |
| **2** | import numpy as np # No need to import again if it has already been imported earlier |
| **3** |  |
| **4** |  |
| **3** | **# Step 2:Define your parameters of C_i from Table B** |
| **4** | Q1 = # Minimum value of C_i in food Groups (Q1) from Table B |
| **5** | Q3 = # Maximum value of C_i in food Groups (Q3) from Table B |
| **6** | i = 10000 # Number of iterations; no need to redefine if already defined |
| **7** |  |
| **8** | **# Step 3: Modeling distribution of C_i** |
| **9** | C_i = (np.random.uniform(Q1, Q3, i))/100 |
| **10** |  |
| **11** |  |
| **12** | **# Step 4 : Display key percentiles of the generated values** |
| **13** | p2_5 = np.percentile(C_i, 2.5) |
| **14** | p50 = np.percentile(C_i, 50) |
| **15** | p97_5 = np.percentile(C_i, 97.5) |
| **16** |  |
| **17** | print("2.5th percentile:", round(p2_5, 3)) |
| **18** | print("50th percentile (median):", round(p50, 3)) |
| **19** | print("97.5th percentile:", round(p97_5, 3)) |
| **20** |  |
| **21** |  |
| **22** |  |
| **23** |  |

**Part 3: Code for the Dietary exposure from Nutrients:**

For the Dietary exposure from Nutrients (), it is represented as a Normal distribution in Python as follows:

| **Line** | **Code** |
| --- | --- |
| **1** | **# Step1: Import the numpy library** |
| **2** | import numpy as np # No need to import again if it has already been imported earlier |
| **3** |  |
| **4** |  |
| **3** | **# Step 2:Define your parameters of E_i** |
| **4** | i = 10000 # Number of iterations; no need to redefine if already defined |
| **5** |  |
| **6** |  |
| **7** |  |
| **8** | **# Step 3: Modeling distribution of E_i using result Part 1 and Part 2 result** |
| **9** | E_i = NNC_i * C_i |
| **10** |  |
| **11** |  |
| **12** | **# Step 4 : Display key percentiles of the generated values** |
| **13** | p2_5 = np.percentile(E_i, 2.5) |
| **14** | p50 = np.percentile(E_i, 50) |
| **15** | p97_5 = np.percentile(E_i, 97.5) |
| **16** |  |
| **17** | print("2.5th percentile:", round(p2_5, 3)) |
| **18** | print("50th percentile (median):", round(p50, 3)) |
| **19** | print("97.5th percentile:", round(p97_5, 3)) |
| **20** |  |
| **21** |  |
| **22** |  |
| **23** |  |

**Part 4: Code for the Dietary exposure from other compound (food additives, contaminants, or specific fortification):**

For the Dietary exposure from Nutrients (), it is represented as a Normal distribution in Python as follows:

| **Line** | **Code** |
| --- | --- |
| **1** | **# Step1: Import the numpy library** |
| **2** | import numpy as np # No need to import again if it has already been imported earlier |
| **3** |  |
| **4** |  |
| **3** | **# Step 2:Define your parameters of E_i** |
| **4** | PF= # number of food items within the food group that may contain substance |
| **5** | AF= # the total number of food items within the same food group |
| **6** | i = 10000 # Number of iterations; no need to redefine if already defined |
| **7** |  |
| **8** | **# Step 3: Modeling distribution of E_i using result Part 1 and Part 2 result** |
| **9** | E_i = NNC_i * C_i |
| **10** |  |
| **11** |  |
| **12** | **# Step 4 : Display key percentiles of the generated values** |
| **13** | p2_5 = np.percentile(E_i, 2.5) |
| **14** | p50 = np.percentile(E_i, 50) |
| **15** | p97_5 = np.percentile(E_i, 97.5) |
| **16** |  |
| **17** | print("2.5th percentile:", round(p2_5, 3)) |
| **18** | print("50th percentile (median):", round(p50, 3)) |
| **19** | print("97.5th percentile:", round(p97_5, 3)) |
| **20** |  |
| **21** |  |
| **22** |  |
| **23** |  |

| **Table A: the Value of mean_NNC, CI_LB and CI_UB for each food Groups** | | | | | | | | | | | | | | | | | | |
| --- | --- | --- | --- | --- | --- | --- | --- | --- | --- | --- | --- | --- | --- | --- | --- | --- | --- | --- |
| **Age** | **Sex** |  | | | | | | | | | | | | | | | | |
| **mean_NNC (CI_LB ,CI_UB)** | | | | | | | | | | | | | | | | |
| **Fruit (g/day)** | **Vegetables (g/day)** | **Grains (g/day)** | Whole grains (g/day) | Refined grains (g/day) | Starchy Vegetables (g/day) | **Protein Foods (g/day)** | Poultry and Meats (g/day) | Fish (g/day) | Eggs (g/day) | Beans and Peas (g/day) | Nuts and seeds (g/day) | **Dairy (mL/day)** | **Sugar-sweetened beverages (mL/day)** | **Coffee and Tea (mL/day)** | **Oil (g/day)** | **Sweets, sauces, and snacks (g/day)** |
| **18yo** | **All** | 91(50,136) | 73(37,116) | 351(174,567) | 18(9,29) | 265(130,431) | 68(35,108) | 144(77,221) | 74(41,109) | 8(4,12) | 22(12,34) | 28(14,44) | 12(6,21) | 118(59,189) | 213(112,332) | 188(98,293) | 38(22,54) | 90(52,129) |
| **Male** | 83(45,127) | 70(35,112) | 348(170,566) | 18(9,29) | 266(129,434) | 64(32,103) | 145(77,222) | 77(43,113) | 8(4,12) | 22(12,34) | 26(13,42) | 12(5,20) | 111(55,179) | 210(109,330) | 186(96,293) | 38(21,54) | 90(51,129) |
| **Female** | 94(51,143) | 72(37,113) | 344(170,558) | 17(8,28) | 260(127,424) | 67(34,106) | 139(74,213) | 71(39,104) | 8(4,12) | 22(12,34) | 27(14,43) | 12(5,20) | 117(57,189) | 204(105,321) | 183(95,288) | 38(21,54) | 90(51,129) |
| **25yo** | **All** | 88(48,132) | 71(36,112) | 340(168,550) | 17(8,28) | 257(126,418) | 66(34,105) | 140(75,214) | 72(40,106) | 8(4,12) | 22(12,33) | 27(14,43) | 12(5,20) | 114(57,183) | 207(109,322) | 182(95,284) | 37(21,52) | 88(50,125) |
| **Male** | 80(44,122) | 67(34,108) | 335(164,546) | 17(8,28) | 256(124,418) | 62(31,99) | 140(75,214) | 74(41,109) | 7(4,12) | 22(12,33) | 25(13,41) | 11(5,19) | 107(53,173) | 202(105,318) | 180(93,282) | 36(21,52) | 87(49,125) |
| **Female** | 92(50,140) | 70(36,110) | 336(165,545) | 17(8,28) | 253(123,413) | 66(34,104) | 136(72,208) | 69(38,101) | 8(4,12) | 21(11,33) | 27(14,42) | 11(5,19) | 114(56,185) | 199(102,314) | 179(93,281) | 37(21,53) | 88(50,126) |
| **30yo** | **All** | 86(47,129) | 69(35,110) | 333(165,538) | 17(8,27) | 251(123,409) | 65(33,102) | 137(73,209) | 70(39,104) | 7(4,12) | 21(11,33) | 26(13,42) | 12(5,20) | 112(56,179) | 202(106,314) | 178(93,278) | 36(20,51) | 86(49,123) |
| **Male** | 78(43,119) | 66(33,105) | 326(159,531) | 17(8,27) | 249(121,407) | 60(30,97) | 136(73,208) | 72(40,106) | 7(4,11) | 21(11,32) | 25(13,40) | 11(5,19) | 104(51,168) | 197(102,309) | 175(90,274) | 35(20,51) | 85(48,121) |
| **Female** | 90(49,137) | 69(36,108) | 330(162,535) | 17(8,27) | 249(121,406) | 64(33,102) | 133(71,204) | 68(38,100) | 7(4,12) | 21(11,33) | 26(14,42) | 11(5,19) | 112(55,181) | 196(100,308) | 176(91,276) | 36(21,52) | 86(49,124) |
| **35yo** | **All** | 84(46,126) | 68(35,107) | 325(161,526) | 16(8,27) | 246(120,399) | 63(32,100) | 134(72,204) | 69(38,101) | 7(4,11) | 21(11,32) | 26(13,41) | 11(5,19) | 109(54,175) | 197(104,307) | 174(91,272) | 35(20,50) | 84(48,120) |
| **Male** | 76(41,115) | 64(32,102) | 317(155,516) | 16(8,27) | 242(117,396) | 59(30,94) | 132(71,203) | 70(39,103) | 7(4,11) | 20(11,31) | 24(12,38) | 11(5,18) | 101(50,163) | 191(99,301) | 170(88,267) | 34(20,49) | 82(47,118) |
| **Female** | 89(48,135) | 68(35,106) | 324(159,525) | 16(8,27) | 244(119,398) | 63(32,100) | 131(70,201) | 66(37,98) | 7(4,11) | 21(11,32) | 26(13,41) | 11(5,19) | 110(54,178) | 192(99,302) | 172(89,271) | 35(20,51) | 85(48,121) |
| **40yo** | **All** | 82(45,123) | 66(34,105) | 318(157,513) | 16(8,26) | 240(118,390) | 62(32,98) | 131(70,200) | 67(37,99) | 7(4,11) | 20(11,31) | 25(13,40) | 11(5,19) | 107(53,171) | 193(101,300) | 170(89,265) | 34(19,49) | 82(47,117) |
| **Male** | 74(40,112) | 62(31,99) | 308(150,502) | 16(8,26) | 236(114,385) | 57(29,91) | 129(69,197) | 68(38,100) | 7(4,11) | 20(11,31) | 23(12,37) | 11(5,18) | 98(48,159) | 186(97,292) | 165(85,259) | 33(19,48) | 80(45,115) |
| **Female** | 87(47,132) | 66(34,104) | 318(156,515) | 16(8,26) | 240(117,391) | 62(32,98) | 129(68,197) | 65(36,96) | 7(4,11) | 20(11,31) | 25(13,40) | 11(5,18) | 108(53,175) | 189(97,297) | 169(88,266) | 35(20,50) | 83(47,119) |
| **45yo** | **All** | 80(44,120) | 64(33,102) | 310(153,501) | 16(8,25) | 234(115,380) | 60(31,95) | 128(68,195) | 65(37,97) | 7(4,11) | 20(11,30) | 25(13,39) | 11(5,18) | 104(52,167) | 188(99,293) | 166(87,259) | 33(19,48) | 80(46,114) |
| **Male** | 72(39,109) | 60(30,97) | 299(146,487) | 15(7,25) | 229(111,374) | 55(28,89) | 125(67,191) | 66(37,97) | 7(3,11) | 19(10,30) | 23(12,36) | 10(5,17) | 95(47,154) | 180(94,284) | 160(83,252) | 32(18,46) | 78(44,111) |
| **Female** | 85(46,130) | 65(34,102) | 312(153,506) | 16(8,26) | 235(115,384) | 61(31,96) | 126(67,193) | 64(36,94) | 7(4,11) | 20(11,31) | 25(13,39) | 10(5,18) | 106(52,171) | 185(95,291) | 166(86,261) | 34(19,49) | 82(47,117) |
| **50yo** | **All** | 78(43,117) | 63(32,100) | 302(149,489) | 15(8,25) | 228(112,371) | 59(30,93) | 124(67,190) | 64(36,94) | 7(4,11) | 19(10,30) | 24(12,38) | 11(5,18) | 101(51,163) | 184(97,286) | 162(84,253) | 32(19,46) | 78(44,111) |
| **Male** | 70(38,106) | 58(29,94) | 290(142,472) | 15(7,24) | 222(107,362) | 54(27,86) | 121(65,185) | 64(36,94) | 6(3,10) | 19(10,29) | 22(11,35) | 10(4,17) | 93(46,150) | 175(91,275) | 155(80,244) | 31(18,45) | 75(43,108) |
| **Female** | 84(45,127) | 64(33,100) | 306(151,496) | 15(8,25) | 231(112,376) | 60(31,95) | 124(66,189) | 63(35,92) | 7(4,11) | 20(10,30) | 24(13,39) | 10(4,18) | 104(51,168) | 182(93,285) | 163(84,256) | 33(19,48) | 80(46,115) |
| **55yo** | **All** | 76(42,115) | 61(31,97) | 295(146,476) | 15(7,24) | 223(109,362) | 57(29,91) | 121(65,185) | 62(35,92) | 7(3,10) | 19(10,29) | 23(12,37) | 10(5,18) | 99(49,159) | 179(94,278) | 158(82,246) | 32(18,45) | 76(43,108) |
| **Male** | 67(37,102) | 57(28,91) | 281(137,458) | 14(7,24) | 215(104,351) | 52(26,83) | 117(63,180) | 62(35,91) | 6(3,10) | 18(10,28) | 21(11,34) | 10(4,16) | 90(44,145) | 170(88,267) | 151(78,236) | 30(17,44) | 73(42,104) |
| **Female** | 82(44,125) | 63(32,98) | 300(148,486) | 15(7,25) | 226(110,369) | 59(30,93) | 121(65,186) | 62(34,90) | 7(3,11) | 19(10,30) | 24(12,38) | 10(4,17) | 102(50,165) | 178(91,280) | 160(83,251) | 33(19,47) | 79(45,112) |
| **60yo** | **All** | 74(41,112) | 60(31,95) | 287(142,464) | 14(7,23) | 217(106,352) | 56(29,88) | 118(63,181) | 60(34,89) | 6(3,10) | 18(10,28) | 23(12,36) | 10(5,17) | 96(48,154) | 174(92,271) | 154(80,240) | 31(18,44) | 74(42,106) |
| **Male** | 65(36,99) | 55(28,88) | 272(133,443) | 14(7,23) | 208(101,340) | 50(25,81) | 114(61,174) | 60(34,89) | 6(3,10) | 18(9,27) | 21(10,33) | 9(4,16) | 87(43,140) | 164(85,258) | 146(75,229) | 29(17,42) | 71(40,101) |
| **Female** | 80(43,122) | 61(32,96) | 294(145,476) | 15(7,24) | 222(108,361) | 57(29,91) | 119(63,182) | 60(34,89) | 7(3,10) | 19(10,29) | 23(12,37) | 10(4,17) | 100(49,162) | 174(89,274) | 156(81,246) | 32(18,46) | 77(44,110) |
| **65yo** | **All** | 72(39,109) | 58(30,92) | 279(138,452) | 14(7,23) | 211(103,343) | 54(28,86) | 115(62,176) | 59(33,87) | 6(3,10) | 18(10,27) | 22(11,35) | 10(4,17) | 94(47,150) | 170(89,264) | 149(78,234) | 30(17,43) | 72(41,103) |
| **Male** | 63(34,96) | 53(27,85) | 263(129,428) | 13(7,22) | 201(97,329) | 49(25,78) | 110(59,168) | 58(32,86) | 6(3,9) | 17(9,26) | 20(10,32) | 9(4,15) | 84(41,136) | 159(83,250) | 141(73,221) | 29(16,41) | 68(39,98) |
| **Female** | 79(43,120) | 60(31,94) | 288(142,467) | 14(7,24) | 217(106,354) | 56(29,89) | 116(62,178) | 59(33,87) | 6(3,10) | 18(10,28) | 23(12,36) | 10(4,16) | 98(48,158) | 171(88,269) | 153(79,241) | 32(18,45) | 75(43,108) |
| **70yo** | **All** | 70(38,106) | 56(29,90) | 272(134,439) | 14(7,22) | 205(101,334) | 53(27,83) | 112(60,171) | 57(32,85) | 6(3,10) | 17(9,27) | 22(11,34) | 10(4,16) | 91(45,146) | 165(87,257) | 145(76,227) | 29(17,42) | 70(40,100) |
| **Male** | 61(33,92) | 51(26,82) | 254(124,414) | 13(6,21) | 194(94,317) | 47(24,75) | 106(57,162) | 56(31,83) | 6(3,9) | 16(9,25) | 19(10,31) | 9(4,15) | 81(40,131) | 153(80,241) | 136(70,214) | 28(16,39) | 66(38,94) |
| **Female** | 77(42,117) | 59(30,92) | 282(139,457) | 14(7,23) | 212(104,347) | 55(28,87) | 114(61,174) | 58(32,85) | 6(3,10) | 18(10,28) | 22(12,35) | 9(4,16) | 96(47,155) | 167(86,263) | 150(78,236) | 31(18,44) | 74(42,106) |
| **75yo** | **All** | 68(37,103) | 55(28,87) | 264(131,427) | 13(7,22) | 200(98,324) | 51(26,81) | 109(58,166) | 56(31,82) | 6(3,9) | 17(9,26) | 21(11,33) | 9(4,16) | 89(44,142) | 160(84,250) | 141(74,221) | 28(16,41) | 68(39,97) |
| **Male** | 59(32,89) | 49(25,79) | 245(120,399) | 13(6,21) | 187(91,306) | 45(23,73) | 102(55,157) | 54(30,80) | 5(3,9) | 16(8,24) | 19(9,30) | 8(4,14) | 78(39,126) | 148(77,233) | 131(68,206) | 27(15,38) | 64(36,91) |
| **Female** | 75(41,115) | 57(30,90) | 276(136,447) | 14(7,23) | 208(101,339) | 54(28,85) | 112(59,171) | 57(32,83) | 6(3,10) | 18(9,27) | 22(11,35) | 9(4,16) | 94(46,152) | 164(84,257) | 147(76,231) | 30(17,43) | 72(41,103) |
| **80yo** | **All** | 66(36,100) | 53(27,85) | 257(127,415) | 13(6,21) | 194(95,315) | 50(25,79) | 106(57,161) | 54(30,80) | 6(3,9) | 16(9,25) | 20(10,32) | 9(4,15) | 86(43,138) | 156(82,242) | 137(72,214) | 28(16,39) | 66(38,94) |
| **Male** | 57(31,86) | 48(24,76) | 236(115,385) | 12(6,20) | 180(87,295) | 44(22,70) | 99(53,151) | 52(29,77) | 5(3,8) | 15(8,23) | 18(9,29) | 8(4,14) | 75(37,122) | 142(74,224) | 126(65,199) | 26(15,37) | 61(35,88) |
| **Female** | 74(40,112) | 56(29,88) | 270(133,437) | 14(7,22) | 203(99,332) | 53(27,83) | 109(58,167) | 55(31,81) | 6(3,10) | 17(9,27) | 21(11,34) | 9(4,15) | 92(45,148) | 160(82,252) | 143(74,226) | 30(17,42) | 71(40,101) |
| **85yo** | **All** | 64(35,97) | 52(27,82) | 249(123,403) | 13(6,20) | 188(92,306) | 48(25,76) | 102(55,157) | 52(29,78) | 6(3,9) | 16(9,24) | 20(10,31) | 9(4,15) | 84(42,134) | 151(79,235) | 133(70,208) | 27(15,38) | 64(37,92) |
| **Male** | 54(30,83) | 46(23,73) | 227(111,370) | 12(6,19) | 174(84,284) | 42(21,67) | 95(51,145) | 50(28,74) | 5(3,8) | 15(8,23) | 17(9,28) | 8(3,13) | 72(36,117) | 137(71,215) | 122(63,191) | 25(14,35) | 59(34,84) |
| **Female** | 72(39,110) | 55(29,87) | 264(130,427) | 13(6,22) | 199(97,324) | 51(26,82) | 107(57,163) | 54(30,80) | 6(3,9) | 17(9,26) | 21(11,33) | 9(4,15) | 90(44,145) | 156(80,246) | 140(73,221) | 29(16,41) | 69(39,99) |
| **ALL** | **All** | 79(43,119) | 62(32,99) | 278(138,450) | 14(7,22) | 206(101,335) | 58(30,92) | 120(64,184) | 57(32,85) | 7(3,10) | 19(10,29) | 24(12,38) | 13(6,22) | 94(47,151) | 131(69,204) | 230(120,360) | 38(22,54) | 90(52,129) |
| **Male** | 75(41,114) | 62(31,100) | 278(136,453) | 14(7,23) | 207(100,339) | 57(29,92) | 122(65,188) | 59(33,88) | 7(3,10) | 19(10,30) | 23(12,38) | 13(6,23) | 91(45,146) | 129(67,203) | 237(123,372) | 38(21,54) | 90(51,129) |
| **Female** | 84(45,127) | 61(32,97) | 274(135,445) | 14(7,22) | 203(99,331) | 58(29,91) | 116(61,178) | 55(31,81) | 6(3,10) | 19(10,29) | 23(12,37) | 12(5,21) | 98(48,159) | 133(68,209) | 220(114,347) | 38(21,54) | 90(51,129) |

| **Table B: the Value of Q1 an Q3 for each food Groups** | | | | | | | | | | | | | | | | | | | | | | | | | | | | | | | | | | | | | | |
| --- | --- | --- | --- | --- | --- | --- | --- | --- | --- | --- | --- | --- | --- | --- | --- | --- | --- | --- | --- | --- | --- | --- | --- | --- | --- | --- | --- | --- | --- | --- | --- | --- | --- | --- | --- | --- | --- | --- |
| **Nutrient** | **Fruit** | |  | **Non-starchy vegetables** | |  | **Grains#** | |  | **Starchy vegetables** | |  | **Meat and poultry** | |  | **Fish** | |  | **Egg** | |  | **Beans and lentils** | |  | **Dairy*** | |  | **Soft drink** | |  | **Coffee and tea** | |  | **Oil** | |  | **Sweets, sauces, and snacks** | |
|  | **Q1** | **Q3** |  | **Q1** | **Q3** |  | **Q1** | **Q3** |  | **Q1** | **Q3** |  | **Q1** | **Q3** |  | **Q1** | **Q3** |  | **Q1** | **Q3** |  | **Q1** | **Q3** |  | **Q1** | **Q3** |  | **Q1** | **Q3** |  | **Q1** | **Q3** |  | **Q1** | **Q3** |  | **Q1** | **Q3** |
| **Weight** | 100.0 | 100.0 |  | 100.0 | 100.0 |  | 100.0 | 100.0 |  | 100.0 | 100.0 |  | 100.0 | 100.0 |  | 100.0 | 100.0 |  | 100.0 | 100.0 |  | 100.0 | 100.0 |  | 100.0 | 100.0 |  | 100.0 | 100.0 |  | 100.0 | 100.0 |  | 100.0 | 100.0 |  | 100.0 | 100.0 |
| **Water (g)** | 64.0 | 86.0 |  | 65.0 | 87.0 |  | 10.0 | 47.0 |  | 51.0 | 77.0 |  | 49.0 | 64.0 |  | 63.0 | 78.0 |  | 49.0 | 72.0 |  | 13.0 | 78.0 |  | 44.0 | 84.0 |  | 87.0 | 95.0 |  | 87.0 | 95.0 |  | 1.0 | 38.0 |  | 3.0 | 19.0 |
| **Total Nitrogen (g)** | 0.0 | 0.0 |  | 0.0 | 1.0 |  | 1.0 | 2.0 |  | 0.0 | 1.0 |  | 3.0 | 5.0 |  | 3.0 | 4.0 |  | 2.0 | 2.0 |  | 1.0 | 3.0 |  | 1.0 | 4.0 |  | 0.0 | 0.0 |  | 0.0 | 0.0 |  | 0.0 | 0.0 |  | 0.0 | 1.0 |
| **Protein (g)** | 1.0 | 1.0 |  | 2.0 | 5.0 |  | 4.0 | 9.0 |  | 2.0 | 4.0 |  | 19.0 | 29.0 |  | 17.0 | 23.0 |  | 11.0 | 15.0 |  | 5.0 | 20.0 |  | 4.0 | 23.0 |  | 0.0 | 0.0 |  | 0.0 | 0.0 |  | 0.0 | 1.0 |  | 1.0 | 6.0 |
| **Fat (g)** | 0.0 | 0.0 |  | 0.0 | 8.0 |  | 2.0 | 15.0 |  | 0.0 | 8.0 |  | 7.0 | 17.0 |  | 1.0 | 6.0 |  | 12.0 | 22.0 |  | 1.0 | 2.0 |  | 2.0 | 29.0 |  | 0.0 | 0.0 |  | 0.0 | 0.0 |  | 73.0 | 100.0 |  | 0.0 | 25.0 |
| **Carbohydrate (g)** | 6.0 | 16.0 |  | 4.0 | 17.0 |  | 34.0 | 66.0 |  | 18.0 | 34.0 |  | 0.0 | 0.0 |  | 0.0 | 0.0 |  | 8.0 | 17.0 |  | 9.0 | 33.0 |  | 2.0 | 10.0 |  | 5.0 | 14.0 |  | 5.0 | 14.0 |  | 0.0 | 1.0 |  | 59.0 | 79.0 |
| **Energy (kcal) (kcal)** | 29.0 | 69.0 |  | 35.0 | 158.0 |  | 239.0 | 375.0 |  | 87.0 | 214.0 |  | 163.0 | 247.0 |  | 89.0 | 143.0 |  | 163.0 | 305.0 |  | 71.0 | 272.0 |  | 72.0 | 348.0 |  | 15.0 | 47.0 |  | 15.0 | 47.0 |  | 715.0 | 899.0 |  | 327.0 | 481.0 |
| **Energy (kJ) (kJ)** | 121.0 | 290.0 |  | 149.0 | 668.0 |  | 1010.0 | 1592.0 |  | 370.0 | 902.0 |  | 689.0 | 1033.0 |  | 366.0 | 599.0 |  | 680.0 | 1270.0 |  | 299.0 | 1158.0 |  | 302.0 | 1482.0 |  | 65.0 | 198.0 |  | 65.0 | 198.0 |  | 2941.0 | 3696.0 |  | 1395.0 | 2020.0 |
| **Starch (g)** | 0.0 | 0.0 |  | 1.0 | 15.0 |  | 21.0 | 50.0 |  | 17.0 | 33.0 |  | 0.0 | 0.0 |  | 0.0 | 0.0 |  | 0.0 | 11.0 |  | 5.0 | 24.0 |  | 0.0 | 0.0 |  | 0.0 | 0.0 |  | 0.0 | 0.0 |  | 0.0 | 0.0 |  | 0.0 | 12.0 |
| **Oligosaccharide (g)** | 1.0 | 1.0 |  | 0.0 | 1.0 |  | 0.0 | 1.0 |  | 0.0 | 0.0 |  | 0.0 | 0.0 |  | 0.0 | 0.0 |  | 0.0 | 0.0 |  | 1.0 | 3.0 |  | 0.0 | 0.0 |  | 5.0 | 5.0 |  | 5.0 | 5.0 |  | 0.0 | 0.0 |  | 8.0 | 14.0 |
| **Total sugars (g)** | 6.0 | 16.0 |  | 2.0 | 4.0 |  | 2.0 | 26.0 |  | 1.0 | 1.0 |  | 0.0 | 0.0 |  | 0.0 | 0.0 |  | 2.0 | 3.0 |  | 1.0 | 3.0 |  | 2.0 | 9.0 |  | 4.0 | 11.0 |  | 4.0 | 11.0 |  | 0.0 | 1.0 |  | 41.0 | 70.0 |
| **Glucose (g)** | 2.0 | 5.0 |  | 0.0 | 1.0 |  | 0.0 | 4.0 |  | 0.0 | 1.0 |  | 0.0 | 0.0 |  | 0.0 | 0.0 |  | 0.0 | 1.0 |  | 0.0 | 1.0 |  | 0.0 | 0.0 |  | 1.0 | 4.0 |  | 1.0 | 4.0 |  | 0.0 | 0.0 |  | 0.0 | 12.0 |
| **Galactose (g)** | 0.0 | 0.0 |  | 0.0 | 0.0 |  | 0.0 | 0.0 |  | 0.0 | 0.0 |  | 0.0 | 0.0 |  | 0.0 | 0.0 |  | 0.0 | 0.0 |  | 0.0 | 0.0 |  | 0.0 | 0.0 |  | 0.0 | 0.0 |  | 0.0 | 0.0 |  | 0.0 | 0.0 |  | 0.0 | 0.0 |
| **Fructose (g)** | 2.0 | 6.0 |  | 0.0 | 1.0 |  | 0.0 | 4.0 |  | 0.0 | 1.0 |  | 0.0 | 0.0 |  | 0.0 | 0.0 |  | 0.0 | 0.0 |  | 0.0 | 1.0 |  | 0.0 | 0.0 |  | 1.0 | 4.0 |  | 1.0 | 4.0 |  | 0.0 | 0.0 |  | 0.0 | 11.0 |
| **Sucrose (g)** | 1.0 | 5.0 |  | 0.0 | 1.0 |  | 1.0 | 20.0 |  | 0.0 | 0.0 |  | 0.0 | 0.0 |  | 0.0 | 0.0 |  | 0.0 | 0.0 |  | 1.0 | 2.0 |  | 0.0 | 0.0 |  | 0.0 | 5.0 |  | 0.0 | 5.0 |  | 0.0 | 0.0 |  | 13.0 | 62.0 |
| **Maltose (g)** | 0.0 | 0.0 |  | 0.0 | 0.0 |  | 0.0 | 2.0 |  | 0.0 | 0.0 |  | 0.0 | 0.0 |  | 0.0 | 0.0 |  | 0.0 | 0.0 |  | 0.0 | 0.0 |  | 0.0 | 0.0 |  | 0.0 | 0.0 |  | 0.0 | 0.0 |  | 0.0 | 0.0 |  | 0.0 | 4.0 |
| **Lactose (g)** | 0.0 | 0.0 |  | 0.0 | 0.0 |  | 0.0 | 1.0 |  | 0.0 | 0.0 |  | 0.0 | 0.0 |  | 0.0 | 0.0 |  | 0.0 | 1.0 |  | 0.0 | 0.0 |  | 1.0 | 5.0 |  | 0.0 | 0.0 |  | 0.0 | 0.0 |  | 0.0 | 1.0 |  | 0.0 | 3.0 |
| **Alcohol (g)** | 0.0 | 0.0 |  | 0.0 | 0.0 |  | 0.0 | 0.0 |  | 0.0 | 0.0 |  | 0.0 | 0.0 |  | 0.0 | 0.0 |  | 0.0 | 0.0 |  | 0.0 | 0.0 |  | 0.0 | 0.0 |  | 0.0 | 0.0 |  | 0.0 | 0.0 |  | 0.0 | 0.0 |  | 0.0 | 0.0 |
| **NSP (g)** | 1.0 | 2.0 |  | 1.0 | 3.0 |  | 1.0 | 3.0 |  | 1.0 | 3.0 |  | 0.0 | 0.0 |  | 0.0 | 0.0 |  | 0.0 | 1.0 |  | 3.0 | 6.0 |  | 0.0 | 0.0 |  | 0.0 | 0.0 |  | 0.0 | 0.0 |  | 0.0 | 0.0 |  | 0.0 | 2.0 |
| **AOAC fiber (g)** | 1.0 | 3.0 |  | 2.0 | 3.0 |  | 2.0 | 4.0 |  | 2.0 | 3.0 |  | 0.0 | 0.0 |  | 0.0 | 0.0 |  | 0.0 | 1.0 |  | 5.0 | 7.0 |  | 0.0 | 0.0 |  | 0.0 | 0.0 |  | 0.0 | 0.0 |  | 0.0 | 0.0 |  | 0.0 | 3.0 |
| **Saturated fatty acids (g)** | 0.0 | 0.1 |  | 0.2 | 2.2 |  | 0.5 | 6.4 |  | 0.3 | 2.5 |  | 2.5 | 7.2 |  | 0.2 | 1.5 |  | 3.0 | 9.7 |  | 0.1 | 0.3 |  | 1.1 | 19.3 |  | 0.0 | 0.0 |  | 0.0 | 0.0 |  | 11.1 | 40.3 |  | 0.0 | 9.7 |
| **Omega-6** **(g)** | 0.1 | 0.2 |  | 0.3 | 1.6 |  | 0.4 | 1.8 |  | 0.5 | 2.8 |  | 0.4 | 1.6 |  | 0.0 | 1.0 |  | 1.4 | 3.5 |  | 0.2 | 1.3 |  | 0.1 | 0.7 |  | 0.0 | 0.0 |  | 0.0 | 0.0 |  | 7.5 | 40.1 |  | 0.9 | 2.8 |
| **Omega-3** **(g)** | 0.0 | 0.3 |  | 0.1 | 0.4 |  | 0.0 | 0.3 |  | 0.0 | 0.1 |  | 0.1 | 0.3 |  | 0.1 | 1.2 |  | 0.1 | 0.4 |  | 0.1 | 0.3 |  | 0.0 | 0.2 |  | 0.0 | 0.0 |  | 0.0 | 0.0 |  | 0.3 | 3.1 |  | 0.1 | 0.1 |
| **Cholesterol (mg)** | 0.0 | 0.0 |  | 0.0 | 3.3 |  | 0.0 | 33.0 |  | 0.0 | 0.0 |  | 71.8 | 100.0 |  | 41.5 | 71.0 |  | 107.3 | 423.0 |  | 0.0 | 0.0 |  | 6.8 | 90.0 |  | 0.0 | 0.0 |  | 0.0 | 0.0 |  | 0.0 | 93.0 |  | 0.0 | 9.4 |
| **Sodium (mg)** | 1.0 | 7.0 |  | 7.0 | 120.0 |  | 64.8 | 358.3 |  | 3.0 | 97.5 |  | 56.3 | 80.0 |  | 84.0 | 324.0 |  | 150.5 | 323.5 |  | 4.0 | 38.0 |  | 50.0 | 665.0 |  | 4.5 | 19.0 |  | 4.5 | 19.0 |  | 8.5 | 600.0 |  | 30.0 | 180.0 |
| **Potassium (mg)** | 111.5 | 263.3 |  | 190.8 | 370.0 |  | 114.0 | 243.0 |  | 371.0 | 715.0 |  | 240.0 | 350.0 |  | 229.0 | 370.0 |  | 143.0 | 224.5 |  | 230.0 | 800.0 |  | 91.0 | 170.5 |  | 5.5 | 37.5 |  | 5.5 | 37.5 |  | 17.5 | 37.0 |  | 43.0 | 362.0 |
| **Calcium (mg)** | 8.0 | 26.3 |  | 21.0 | 62.0 |  | 34.5 | 117.0 |  | 11.0 | 17.0 |  | 6.0 | 15.0 |  | 17.0 | 64.5 |  | 54.0 | 177.0 |  | 28.0 | 76.5 |  | 123.0 | 552.5 |  | 2.5 | 6.5 |  | 2.5 | 6.5 |  | 3.8 | 14.8 |  | 10.5 | 98.0 |
| **Magnesium (mg)** | 7.0 | 16.0 |  | 14.0 | 34.0 |  | 15.0 | 42.0 |  | 18.0 | 32.5 |  | 18.0 | 25.0 |  | 22.5 | 35.0 |  | 13.0 | 23.0 |  | 27.0 | 77.3 |  | 12.0 | 24.8 |  | 1.0 | 3.0 |  | 1.0 | 3.0 |  | 1.0 | 2.0 |  | 3.8 | 51.0 |
| **Phosphorus (mg)** | 11.0 | 28.0 |  | 35.8 | 94.3 |  | 86.5 | 186.8 |  | 44.5 | 97.0 |  | 160.0 | 220.0 |  | 160.3 | 253.0 |  | 164.0 | 227.0 |  | 86.0 | 270.0 |  | 106.0 | 416.0 |  | 1.0 | 3.8 |  | 1.0 | 3.8 |  | 6.3 | 14.5 |  | 10.8 | 142.5 |
| **Iron (mg)** | 0.2 | 0.8 |  | 0.5 | 1.6 |  | 0.8 | 2.0 |  | 0.4 | 0.8 |  | 0.9 | 2.1 |  | 0.3 | 1.1 |  | 0.9 | 2.2 |  | 1.5 | 3.5 |  | 0.1 | 0.3 |  | 0.1 | 0.3 |  | 0.1 | 0.3 |  | 0.0 | 0.1 |  | 0.4 | 1.9 |
| **Copper (mg)** | 0.0 | 0.1 |  | 0.1 | 0.2 |  | 0.1 | 0.3 |  | 0.1 | 0.1 |  | 0.0 | 0.1 |  | 0.0 | 0.1 |  | 0.0 | 0.1 |  | 0.1 | 0.5 |  | 0.0 | 0.1 |  | 0.0 | 0.0 |  | 0.0 | 0.0 |  | 0.0 | 0.0 |  | 0.1 | 0.3 |
| **Zinc (mg)** | 0.1 | 0.3 |  | 0.3 | 0.8 |  | 0.5 | 1.2 |  | 0.3 | 0.5 |  | 1.6 | 4.8 |  | 0.4 | 0.8 |  | 1.0 | 1.7 |  | 0.7 | 2.4 |  | 0.5 | 2.7 |  | 0.0 | 0.1 |  | 0.0 | 0.1 |  | 0.1 | 0.1 |  | 0.2 | 0.9 |
| **Chloride (mg)** | 4.0 | 53.0 |  | 44.0 | 195.0 |  | 116.5 | 428.0 |  | 89.0 | 150.0 |  | 52.0 | 75.0 |  | 130.0 | 500.0 |  | 179.3 | 458.3 |  | 8.0 | 59.0 |  | 110.0 | 970.0 |  | 1.0 | 3.0 |  | 1.0 | 3.0 |  | 26.5 | 932.5 |  | 31.3 | 352.0 |
| **Manganese (mg)** | 0.1 | 0.3 |  | 0.1 | 0.5 |  | 0.3 | 0.8 |  | 0.1 | 0.2 |  | 0.0 | 0.0 |  | 0.0 | 0.1 |  | 0.0 | 0.2 |  | 0.4 | 1.2 |  | 0.0 | 0.0 |  | 0.0 | 0.0 |  | 0.0 | 0.0 |  | 0.0 | 0.0 |  | 0.1 | 0.4 |
| **Selenium (µg)** | 1.0 | 1.0 |  | 1.0 | 4.5 |  | 3.0 | 7.0 |  | 1.8 | 2.3 |  | 4.0 | 11.0 |  | 21.0 | 45.8 |  | 9.0 | 27.0 |  | 2.0 | 12.5 |  | 2.0 | 7.0 |  | 0.0 | 0.0 |  | 0.0 | 0.0 |  | 1.0 | 1.0 |  | 1.0 | 3.3 |
| **Iodine (µg)** | 1.0 | 3.0 |  | 2.0 | 7.0 |  | 4.0 | 17.0 |  | 1.0 | 3.3 |  | 6.0 | 10.0 |  | 16.5 | 120.0 |  | 23.0 | 53.0 |  | 2.0 | 4.3 |  | 23.3 | 46.0 |  | 0.0 | 0.0 |  | 0.0 | 0.0 |  | 5.0 | 38.0 |  | 7.0 | 18.5 |
| **Retinol (µg)** | 0.0 | 0.0 |  | 0.0 | 0.0 |  | 0.0 | 45.8 |  | 0.0 | 0.0 |  | 7.0 | 19.5 |  | 3.0 | 38.0 |  | 94.0 | 215.0 |  | 0.0 | 0.0 |  | 22.0 | 297.0 |  | 0.0 | 0.0 |  | 0.0 | 0.0 |  | 0.0 | 742.0 |  | 0.0 | 15.0 |
| **Carotene (µg)** | 14.0 | 130.0 |  | 43.0 | 668.0 |  | 0.0 | 86.0 |  | 4.5 | 16.5 |  | 7.0 | 8.0 |  | 1.0 | 188.0 |  | 29.5 | 108.0 |  | 12.0 | 118.0 |  | 19.5 | 199.5 |  | 0.0 | 261.0 |  | 0.0 | 261.0 |  | 292.5 | 655.0 |  | 0.0 | 31.8 |
| **Retinol equivalent (µg)** | 2.0 | 21.5 |  | 12.0 | 140.5 |  | 0.0 | 63.3 |  | 0.0 | 2.0 |  | 6.0 | 17.3 |  | 3.3 | 44.0 |  | 103.3 | 235.0 |  | 2.0 | 23.0 |  | 32.0 | 333.0 |  | 0.0 | 64.0 |  | 0.0 | 64.0 |  | 622.5 | 1060.0 |  | 0.0 | 38.0 |
| **Vitamin D (µg)** | 0.0 | 0.0 |  | 0.0 | 0.0 |  | 0.0 | 0.3 |  | 0.0 | 0.0 |  | 0.4 | 0.6 |  | 2.0 | 9.3 |  | 0.8 | 3.2 |  | 0.0 | 0.0 |  | 10.1 | 10.3 |  | 0.0 | 0.0 |  | 0.0 | 0.0 |  | 0.0 | 1.0 |  | 0.0 | 0.0 |
| **Vitamin E (mg)** | 0.1 | 0.6 |  | 0.6 | 2.2 |  | 0.3 | 1.8 |  | 0.1 | 1.5 |  | 0.1 | 0.2 |  | 0.5 | 2.1 |  | 1.3 | 3.8 |  | 0.3 | 1.1 |  | 0.1 | 0.6 |  | 0.0 | 0.0 |  | 0.0 | 0.0 |  | 3.1 | 21.7 |  | 0.0 | 1.7 |
| **Vitamin K1 (µg)** | 0.2 | 5.6 |  | 2.3 | 33.4 |  | 0.4 | 2.8 |  | 0.9 | 9.2 |  | 0.1 | 0.5 |  | 0.0 | 0.2 |  | 1.7 | 1.7 |  | 12.0 | 34.7 |  | 0.4 | 3.7 |  | 0.0 | 0.0 |  | 0.0 | 0.0 |  | 3.4 | 57.5 |  | 2.9 | 13.0 |
| **Thiamin (mg)** | 0.0 | 0.1 |  | 0.1 | 0.2 |  | 0.1 | 0.2 |  | 0.1 | 0.2 |  | 0.1 | 0.1 |  | 0.0 | 0.2 |  | 0.1 | 0.1 |  | 0.1 | 0.4 |  | 0.0 | 0.1 |  | 0.0 | 0.0 |  | 0.0 | 0.0 |  | 0.0 | 0.0 |  | 0.0 | 0.1 |
| **Riboflavin (mg)** | 0.0 | 0.0 |  | 0.0 | 0.1 |  | 0.1 | 0.2 |  | 0.0 | 0.1 |  | 0.2 | 0.3 |  | 0.1 | 0.2 |  | 0.3 | 0.5 |  | 0.0 | 0.1 |  | 0.2 | 0.4 |  | 0.0 | 0.0 |  | 0.0 | 0.0 |  | 0.0 | 0.1 |  | 0.0 | 0.2 |
| **Niacin (mg)** | 0.2 | 0.6 |  | 0.4 | 1.0 |  | 0.6 | 2.1 |  | 0.5 | 1.7 |  | 4.2 | 6.5 |  | 1.8 | 4.6 |  | 0.1 | 0.7 |  | 0.5 | 2.1 |  | 0.1 | 0.2 |  | 0.0 | 0.1 |  | 0.0 | 0.1 |  | 0.1 | 0.1 |  | 0.1 | 0.6 |
| **Niacin equivalent (mg)** | 0.3 | 0.7 |  | 0.7 | 1.8 |  | 1.7 | 4.1 |  | 1.1 | 2.5 |  | 8.5 | 12.4 |  | 4.7 | 8.6 |  | 3.0 | 4.4 |  | 1.5 | 4.8 |  | 0.9 | 5.8 |  | 0.0 | 0.1 |  | 0.0 | 0.1 |  | 0.1 | 0.1 |  | 0.2 | 2.0 |
| **Vitamin B6 (mg)** | 0.0 | 0.1 |  | 0.1 | 0.2 |  | 0.1 | 0.1 |  | 0.1 | 0.2 |  | 0.2 | 0.4 |  | 0.1 | 0.3 |  | 0.1 | 0.2 |  | 0.1 | 0.3 |  | 0.0 | 0.1 |  | 0.0 | 0.0 |  | 0.0 | 0.0 |  | 0.0 | 0.0 |  | 0.0 | 0.2 |
| **Vitamin B12 (µg)** | 0.000 | 0.000 |  | 0.000 | 0.000 |  | 0.000 | 0.400 |  | 0.000 | 0.000 |  | 2.000 | 3.000 |  | 1.400 | 4.900 |  | 1.100 | 2.600 |  | 0.000 | 0.000 |  | 0.300 | 1.300 |  | 0.000 | 0.000 |  | 0.000 | 0.000 |  | 0.000 | 0.000 |  | 0.000 | 0.000 |
| **Folate (µg)** | 3.000 | 13.000 |  | 12.000 | 38.000 |  | 7.000 | 23.000 |  | 10.000 | 30.000 |  | 5.000 | 15.000 |  | 5.000 | 13.000 |  | 14.500 | 40.000 |  | 28.000 | 120.000 |  | 9.000 | 35.000 |  | 0.000 | 2.000 |  | 0.000 | 2.000 |  | 0.500 | 1.000 |  | 0.500 | 12.000 |
| **Pantothenate (mg)** | 0.100 | 0.200 |  | 0.200 | 0.400 |  | 0.300 | 0.600 |  | 0.400 | 0.500 |  | 0.700 | 1.200 |  | 0.200 | 0.700 |  | 0.700 | 1.300 |  | 0.200 | 0.900 |  | 0.300 | 0.600 |  | 0.000 | 0.000 |  | 0.000 | 0.000 |  | 0.000 | 0.100 |  | 0.000 | 0.700 |
| **Biotin (µg)** | 0.200 | 1.300 |  | 0.400 | 2.800 |  | 1.700 | 5.000 |  | 0.300 | 0.500 |  | 2.000 | 2.000 |  | 1.500 | 5.000 |  | 7.500 | 21.100 |  | 0.500 | 2.600 |  | 1.900 | 3.900 |  | 0.000 | 0.000 |  | 0.000 | 0.000 |  | 0.100 | 0.300 |  | 0.100 | 3.000 |
| **Vitamin C (mg)** | 4.000 | 27.000 |  | 3.000 | 18.000 |  | 0.000 | 1.000 |  | 5.300 | 13.000 |  | 0.000 | 0.000 |  | 0.300 | 3.000 |  | 0.000 | 1.000 |  | 2.000 | 15.000 |  | 1.000 | 2.000 |  | 0.000 | 4.500 |  | 0.000 | 4.500 |  | 0.000 | 0.000 |  | 0.000 | 0.000 |
